# Supplementary material for: The THO complex cooperates with the nuclear RNA surveillance machinery to control small nucleolar RNA expression
Source: PubMed Central journal article supplement — Nucleic Acids Res. 2012 Sep 8;40(20):10240–53. doi: 10.1093/nar/gks838 (PMC3488260; doi:10.1093/nar/gks838), 2012-09-08
Supplement: supp_gks838_nar-01341-a-2012-File009.pdf [file supp_gks838_nar-01341-a-2012-File009.pdf]

## SUPPLEMENTAL FIGURES

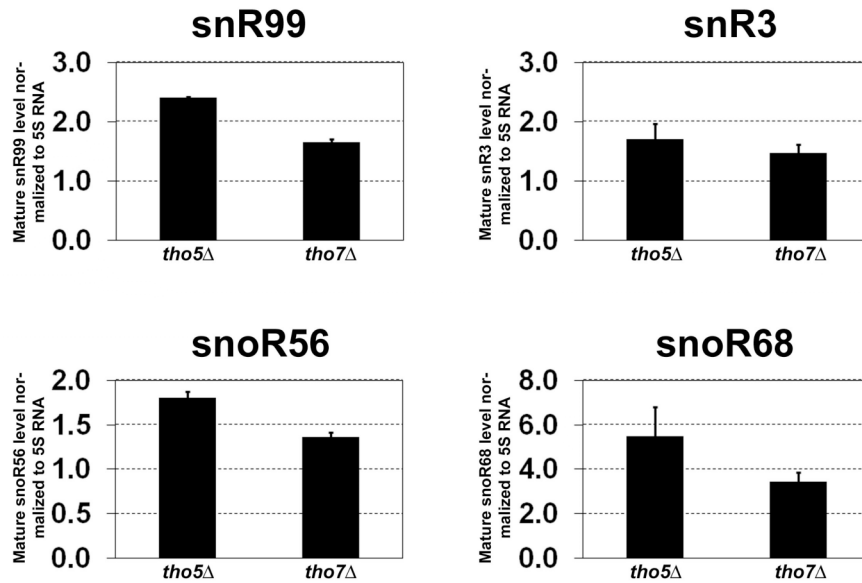

**Figure S1. Increased levels of mature snoRNAs in *tho5Δ* and *tho7Δ* strains.** Quantification of Northern blot data for the indicated snoRNAs. Values were normalized to the 5S rRNA and are relative to wild-type cells. The data and error bars represent the average and standard deviation from at least three independent experiments.

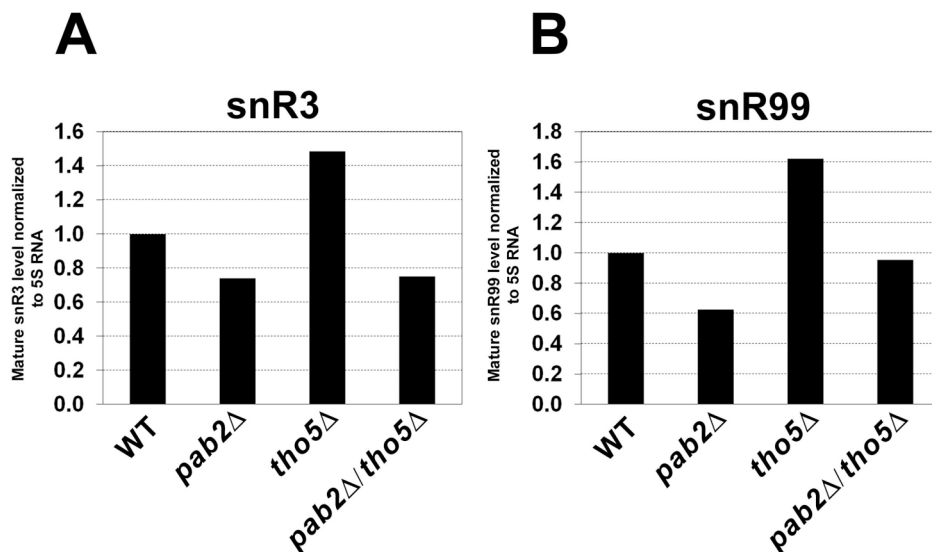

**Figure S2. Pab2-dependent maturation is required for the accumulation of mature snoRNA in a THO mutant.** Quantification of Northern blot data for snR3 (A) and snR99 (B). Values were normalized to the 5S rRNA and are relative to wild-type cells. The data were calculated based on the Northern blots shown in Fig. 1C-1D.

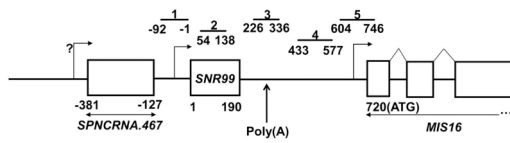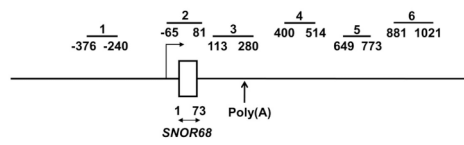

**A**

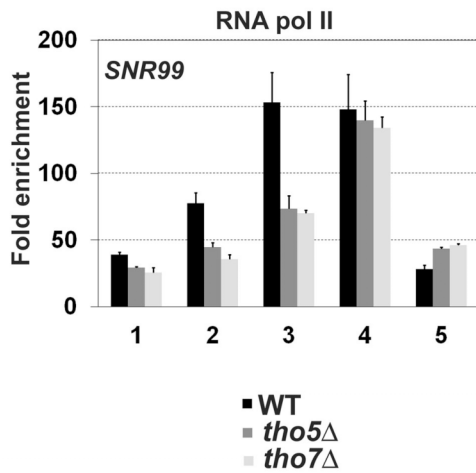

**B**

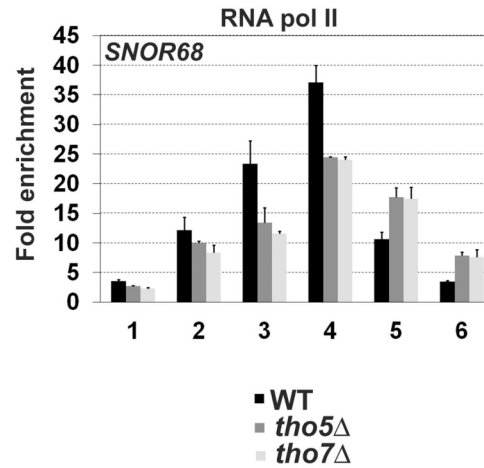

**Figure S3. The accumulation of snoRNAs in THO deletion strains is not associated with increased transcription.** ChIP assays were performed using an RNA Pol II-specific antibody at *SNR99* (A) and *SNOR68* (B) genes using primers shown above, as described in Fig. 2A. The data are presented as the fold enrichment compared to a nontranscribed intergenic region. Data and error bars represent the average and standard deviation from three biological replicates.

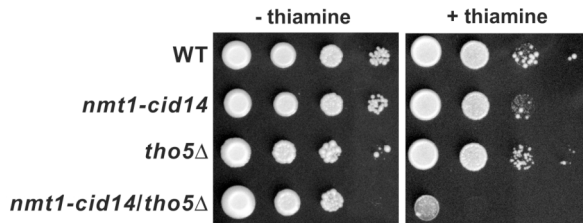

**Figure S4. Genetic interaction between *tho5* and *cid14*.** 10-fold serial dilutions of WT, *nmt1-cid14*, *tho5*Δ, and *nmt1-cid14/tho5*Δ strains were cultured in the presence or in the absence of thiamine.

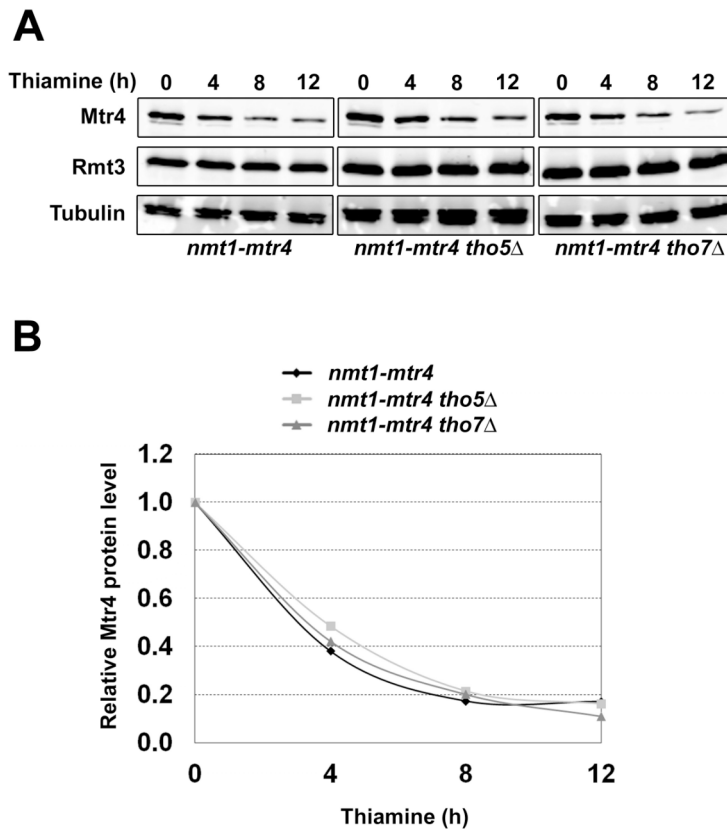

**Figure S5. Analysis of thiamine-dependent Mtr4 depletion in wild-type and THO-depleted strains.** (A) Wild-type, *tho5*Δ, and *tho7*Δ cells that express Mtr4 under the control of the thiamine-sensitive *nmt1* promoter were grown to early log-phase, and shifted to medium containing thiamine for 0-12 h. Total cell extracts were prepared and analyzed by immunoblotting using antibodies specific to Mtr4 (upper panel) and control proteins: Rmt3 (middle panel) and tubulin (lower panel). (B) Quantification of Mtr4 depletion kinetics were determined by calculating Mtr4/Rmt3 ratios for each time point and expressed relative to the initial zero time point (t=0h). Similar results were obtained using data normalized to tubulin (not shown).

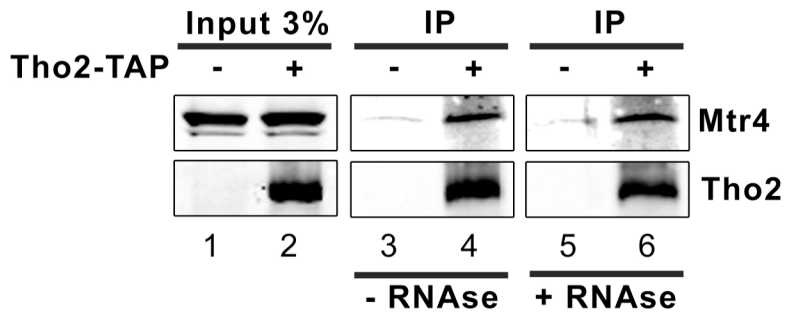

**Figure S6. The association between Tho2 and Mtr4 is not sensitive to RNase.** Western blot analysis of total cell extract (lanes 1-2) and IgG-sepharose purifications (lanes 3-6) prepared from cells that expressed a TAP-tagged version of Tho2 (lanes 2, 4, and 6) and untagged control cells (lanes 1, 3, and 5). Following IgG purification, the samples were subsequently divided and treated (lanes 5-6) or not treated (lanes 3-4) with RNase A and T1 for 10 min at 25°C. Tho2-TAP and Mtr4 were detected by probing the blot with Mtr4 (*top*) and TAP (*bottom*) antibodies.

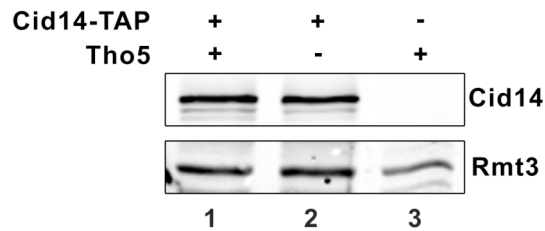

**Figure S7. The absence of Tho5 does not affect Cid14 expression.** Western blot analysis of total extracts prepared from wild-type (lane 1) and *tho5Δ* cells (lane 2) that express a TAP-tagged version of Cid14. A total extract prepared from wild-type cells that do not express Cid14-TAP (lane 3) were used to control the specific detection of Cid14-TAP. An antibody specific to the Rmt3 arginine methyltransferase (*bottom*) was used as a loading control.

## SUPPLEMENTARY TABLE

**Table S1.** Yeast strains used in this study

| Strain  | Genotype                                                                      | Reference  |
|---------|-------------------------------------------------------------------------------|------------|
| FBY106  | <i>h+ ade6-M216 leu1-32 ura4-D18 his3-D1</i>                                  | (20)       |
| FBY176  | <i>h+ leu1- ura4- his2- dis3-54</i>                                           | (20)       |
| FBY245  | <i>h- ade6-M210 leu1-32 ura4-D18 his3-D1 cid14::URA4</i>                      | (20)       |
| FBY542  | <i>h+ ade6-M21? leu1-32 ura4-D18 his3-D1 pab2::KanMX6</i>                     | This study |
| FBY250  | <i>h- ade6-M216 leu1-32 ura4-D18 his3-D1 cid14::URA4 pab2::KanMX6</i>         | (20)       |
| FBY543  | <i>h- ade6-M21? leu1-32 ura4-D18 his3-D1 tho5::URA4</i>                       | This study |
| FBY544  | <i>h+ ade6-M21? leu1-32 ura4-D18 his3-D1 tho5::URA4 pab2::KanMX6</i>          | This study |
| FBY564  | <i>h+ ade6-M216 leu1-32 ura4-D18 his3-D1 tex1::URA4</i>                       | This study |
| FBY611  | <i>h+ ade6-M216 leu1-32 ura4-D18 his3-D1 tho7::URA4</i>                       | This study |
| FBY621  | <i>h+ ade6-M216 leu1-32 ura4-D18 his3-D1 air1::KanMX6</i>                     | This study |
| FBY648  | <i>h+ ade6-M216 leu1-32 ura4-D18 his3-D1 air1::KanMX6 pab2::his3</i>          | This study |
| FBY644  | <i>h- ade6-M210 leu1-32 ura4-D18 his3-D1 Tho2-TAP::KanMX6</i>                 | This study |
| FBY645  | <i>h- ade6-M210 leu1-32 ura4-D18 his3-D1 Tho5-TAP::KanMX6</i>                 | This study |
| FBY737  | <i>h? ade6-M21? leu1-32 ura4-D18 his3-D1 Cid14-TAP::KanMX6</i>                | This study |
| FBY739  | <i>h? ade6-M21? leu1-32 ura4-D18 his3-D1 Cid14-TAP::KanMX6 tho5::URA4</i>     | This study |
| FBY963  | <i>h? ade6-M21? leu1-32 ura4-D18 his3-D1 KanMX6::p81nmt1-mtr4</i>             | (35)       |
| FBY964  | <i>h? ade6-M21? leu1-32 ura4-D18 his3-D1 p81nmt1::kanMX6-mtr4 pab2::ura4</i>  | (35)       |
| FBY984  | <i>h+ ade6-M216 leu1-32 ura4-D18 his3-D1 pFB366::ade6</i>                     | This study |
| FBY987  | <i>h- ade6-M210 leu1-32 ura4-D18 his3-D1 cid14::URA4 pFB366::ade6</i>         | This study |
| FBY994  | <i>h- ade6-M210 leu1-32 ura4-D18 his3-D1 cid14::URA4 pFB494::ade6</i>         | This study |
| FBY1063 | <i>h- ade6-M210 leu1-32 ura4-D18 his3-D1 cid14::URA4 pFB495::ade6</i>         | This study |
| FBY1116 | <i>h? ade6-M21? leu1-32 ura4-D18 his3-D1 Cid14-TAP::KanMX6 tho7::URA4</i>     | This study |
| FBY1190 | <i>h? ade6-M21? leu1-32 ura4-D18 his3-D1 KanMX6::p81nmt1-cid14 tho5::URA4</i> | This study |
| FBY1192 | <i>h? ade6-M21? leu1-32 ura4-D18 his3-D1 KanMX6::p81nmt1-cid14</i>            | This study |
| FBY1196 | <i>h? ade6-M21? leu1-32 ura4-D18 his3-D1 KanMX6::p81nmt1-mtr4 tho5::URA4</i>  | This study |
| FBY1197 | <i>h? ade6-M21? leu1-32 ura4-D18 his3-D1 KanMX6::p81nmt1-mtr4 tho7::URA4</i>  | This study |
